# Supplementary material for: The later, the better: Evening chronotypes in Uruguayan shift workers are associated with longer sleep in an observational study
Source: Research Square preprint supplement (doi:10.21203/rs.3.rs-6172058/v1), 2025-04-07
Supplement: Supplementary file 1 [file b31d05a6bbfcdec5e5dcac21.docx]

**Title:**

The later, the better: Evening chronotypes in Uruguayan shift workers are associated with longer sleep in an observational study

**Authors:**

José Mathias Cosentino1, Bettina Tassino1,2, Ignacio Estevan1,3*

#

# Supplementary materials

|  | Morning shift | | Night shift | | Afternoon shift | |
| --- | --- | --- | --- | --- | --- | --- |
|  | Workday | Day off | Workday | Day off | Workday | Day off |
| Sleep onset | 00:05±00:53 | 00:37±01:09 | 07:40±01:16 | 01:29±01:54 | 01:09±01:05 | 01:05±01:20 |
| Sleep end | 04:59±00:23 | 08:53±01:52 | 12:44±01:47 | 09:36±02:01 | 09:06±01:42 | 09:25±01:49 |
| Sleep duration | 4.9±0.8 | 8.2±1.4 | 5.0±1.5 | 8.1±1.6 | 7.9±1.3 | 8.3±1.2 |
| Naps | 46 (54.1%) | 19 (22.3%) | 45 (52.9%) | 18 (21.1%) | 2 (2.3%) | 14 (16.4%) |
| Sleep duration on a 24-h basis | 5.8±1.1 | 8.5±1.6 | 5.9±1.5 | 8.4±1.6 | 7.9±1.3 | 8.5±1.3 |

**Table S1. Sleep pattern by work shift and day type.**
